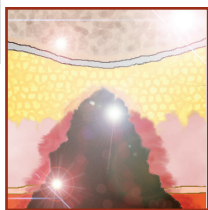

# PREDICTIVE MODELING OF PRESSURE INJURY RISK IN PATIENTS ADMITTED TO AN INTENSIVE CARE UNIT

By Mireia Ladios-Martin, MSN, RN, José Fernández-de-Maya, PhD, MSN, RN, Francisco-Javier Ballesta-López, MSN, RN, Adrián Belso-Garzas, MS, Manuel Mas-Asencio, MS, and María José Cabañero-Martínez, PhD, MSN, RN

**Background** Pressure injuries are an important problem in hospital care. Detecting the population at risk for pressure injuries is the first step in any preventive strategy. Available tools such as the Norton and Braden scales do not take into account all of the relevant risk factors. Data mining and machine learning techniques have the potential to overcome this limitation.

**Objectives** To build a model to detect pressure injury risk in intensive care unit patients and to put the model into production in a real environment.

**Methods** The sample comprised adult patients admitted to an intensive care unit (N=6694) at University Hospital of Torrevieja and University Hospital of Vinalopó. A retrospective design was used to train (n = 2508) and test (n=1769) the model and then a prospective design was used to test the model in a real environment (n=2417). Data mining was used to extract variables from electronic medical records and a predictive model was built with machine learning techniques. The sensitivity, specificity, area under the curve, and accuracy of the model were evaluated.

**Results** The final model used logistic regression and incorporated 23 variables. The model had sensitivity of 0.90, specificity of 0.74, and area under the curve of 0.89 during the initial test, and thus it outperformed the Norton scale. The model performed well 1 year later in a real environment.

**Conclusions** The model effectively predicts risk of pressure injury. This allows nurses to focus on patients at high risk for pressure injury without increasing workload. (*American Journal of Critical Care*. 2020;29:e70-e80)

**P**ressure injuries (PIs) are localized injuries of the skin or underlying tissue, usually over a bony prominence, that result from pressure or pressure in combination with shear.<sup>1</sup> Most PIs are avoidable,<sup>2,3</sup> and thus PIs represent a problem in the quality of health care. These injuries can have a profound impact on patients, their families, professionals, and institutions. Pressure injuries develop in 0.3% to 20% of hospitalized patients<sup>4,5</sup> and in 3.3% to 53.4% of patients in intensive care units (ICUs).<sup>6,7</sup> More PIs occur in patients in intensive care units than in hospital patients overall because of the greater vulnerability of patients in intensive care units. The cost of hospital-acquired PIs in the United States could exceed \$26.8 billion annually.<sup>8</sup>

The first step in any strategy to prevent PIs is to detect the population at risk for PIs. Tools have been developed to detect PI risk in patients, including the Norton, Braden, and Waterlow scales.<sup>9-11</sup> These scales take into account basic dimensions to detect PI; however, they fail to address some variables that have been identified as risk factors for PIs, including hematological values,<sup>12-14</sup> oxygenation and perfusion,<sup>15</sup> and the presence of diabetes<sup>11</sup> or vascular disease.<sup>16</sup> In our context, we used the Norton scale, which is implemented by nurses and based on observations and interviews within the first 24 hours after admission or after a significant change in health state. The Norton scale measures 5 variables: type of activity, physical condition, mental state, type of incontinence, and mobility type.<sup>11</sup>

Electronic medical records (EMR) facilitate comparison and analysis of the characteristics of patients in whom PIs develop. Data mining and machine learning techniques can reveal complex and meaningful patterns in the large volume of data contained in EMRs, and may allow us to predict future events such as the development of a PI. Researchers in the health sciences have used data mining and machine learning extensively, but few have applied the techniques to the field of nursing. Some researchers have used data mining or machine

learning to build models to study risk for PIs,<sup>17-24</sup> but few of those models have progressed to production (ie, availability for real-time use),<sup>25,26</sup> which is a common problem in any field where machine learning techniques are applied.<sup>27</sup> Data mining and machine learning models can automatically integrate and analyze the characteristics of each individual case,

which makes it easier to manage the risk of PIs in individual patients in real time. In addition, machine learning systems can continuously learn as new cases emerge and thus adapt a model to new situations.<sup>28</sup>

We believe that the application of data mining and machine learning techniques can complement and improve upon the predictive power of the Norton risk assessment scale. The resulting model could help nurses to improve the care that patients receive throughout their hospital stay. In the present study, we built a model to detect PI risk in patients admitted to an ICU and put the model into production in a real environment.

## Methods Design

The study was divided into 2 phases: In the first phase, we used a retrospective design to train and test the model; in the second phase, we used a sequential prospective design to test the model in a real environment (Figure 1). We followed the cross-industry standard process for data mining (CRISP-DM) to develop the predictive model<sup>24</sup> and subsequently apply it in a real environment. The CRISP-DM is widely used in many data mining and machine learning studies and is a comprehensive method and process model that breaks down the life cycle of a data mining project into 6 phases: business understanding, data understanding, data preparation, modeling, evaluation, and deployment.<sup>29</sup>

Traditional scales fail to address some variables that have been identified as risk factors for PIs.

### About the Authors

**Mireia Ladios-Martin** is head of quality, Ribera Salud, Valencia, Spain. **José Fernández-de-Maya** is a patient safety officer, University Hospital of Vinalopó, Alicante, Spain, and University Hospital of Torrevieja, Alicante, Spain. **Francisco-Javier Ballesta-López** is coordinator of the Population Health Management Unit, University Hospital of Vinalopó and University Hospital of Torrevieja. **Adrián Belso-Garzas** is a data science lead and **Manuel Mas-Asencio** is a data analytics manager, Futurs, Alicante, Spain. **María José Cabañero-Martínez** is an associate professor, Nursing Department, University of Alicante, Spain.

**Corresponding author:** Mireia Ladios-Martin, MSN, RN, Ribera Salud, Edificio Sorolla Center, Avda Cortes Valencianas, 58, 46015, Valencia, Spain (email: mladios@riberasalud.es).

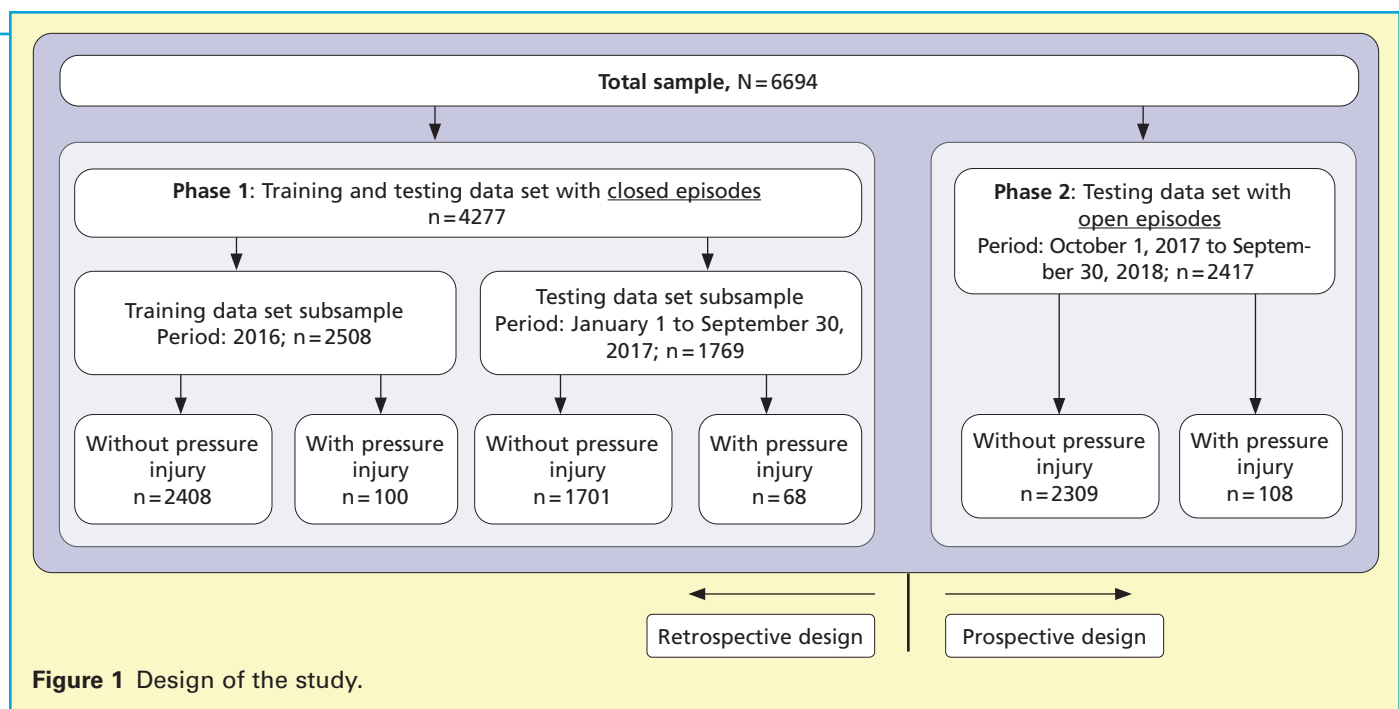

**Figure 1** Design of the study.

### Setting and Population

The research took place at 2 university hospitals in Spain. Both are public health centers; University Hospital of Vinalopó has 230 beds including a medical and surgical ICU with 16 beds, and the University Hospital of Torrevieja has 277 beds including a medical and surgical ICU with 15 beds. The study population comprised adult patients admitted at least once to the ICU, during their ICU stay and their subsequent acute hospitalization, if any.

### Sample

The total sample (N=6694) comprised all adult patients admitted to the ICU during their hospital stay from January 1, 2016, through September 30, 2018. Patients admitted for less than 72 hours, patients under

16 years of age, and obstetric patients were excluded. The sample for the first phase (n=4277) comprised patients admitted January 1, 2016, through September 30, 2017, and the sample for the second phase (n=2417) comprised patients admitted from October 1, 2017, through September 30, 2018. During the first phase, the sample was divided into 2

subsamples, one for training the model (n=2508) and another for testing the model (n=1769). In the second phase, the entire sample was used to test the model. The homogeneity of variance and

the relation of the subsamples used for model training and testing were checked with the  $\chi^2$  independence test and the Student *t* test (Table 1).

### Data Preparation

The group of cases included patients whose EMR showed a “hospital-acquired PI type wound” in the Wound Tracking Form during their stay in ICU or their subsequent acute hospitalization stay during the same admission. If a patient had more than 1 PI develop, only the first one was included in our analysis. Stage 1 through 4 PIs and unstageable PIs were included.<sup>30</sup> The number of PIs identified in this way was smaller than we expected in light of existing literature on the incidence of PI in hospitalized patients.<sup>6,7</sup> Therefore, we recovered cases of PIs that were not designated as “hospital-acquired PI type wound” on the EMR by using a search algorithm to locate free text records of concepts related to PI treatments in the nursing records. One reviewer checked and confirmed the cases located by the algorithm. A corrective action was taken in the EMR to register the recovered cases of PI on the Wound Tracking Form and thus incorporate them into the group of patients with PIs. The cases identified with the recovery algorithm accounted for 47% of the total cases in the first phase.

On the basis of a literature review,<sup>13,23</sup> we identified 93 variables as possible predictors of PIs. We then evaluated our ability to obtain data on these variables. Out of the 93 variables, we discarded 26 because of a high number of missing values or inability to recover the data from the EMRs. We selected the remaining 67 variables (listed in a Supplement

Data mining was used to extract variables from electronic medical records, and a predictive model was built with machine learning techniques.

**Table 1**  
Characteristics of patients

| Variable                                | Phase 1                               |                                               |                                         |                                                         | Phase 2 |                                         |                                                         |      |
|-----------------------------------------|---------------------------------------|-----------------------------------------------|-----------------------------------------|---------------------------------------------------------|---------|-----------------------------------------|---------------------------------------------------------|------|
|                                         | Total sample <sup>a</sup><br>(n=4277) | Training sample <sup>a</sup> 2016<br>(n=2508) | Testing sample <sup>a</sup><br>(n=1769) | Statistics <sup>b</sup><br>$\chi^2$ or t P <sup>c</sup> |         | Testing sample <sup>a</sup><br>(n=2417) | Statistics <sup>d</sup><br>$\chi^2$ or t P <sup>c</sup> |      |
| Sex                                     |                                       |                                               |                                         |                                                         |         |                                         |                                                         |      |
| Male                                    | 2815 (65.82)                          | 1634 (65.15)                                  | 1181 (66.76)                            | 1.2                                                     | .27     | 1607 (66.49)                            | 1.0                                                     | .32  |
| Female                                  | 1462 (34.18)                          | 874 (34.85)                                   | 588 (33.24)                             |                                                         |         | 810 (33.51)                             |                                                         |      |
| Age range, y                            |                                       |                                               |                                         |                                                         |         |                                         |                                                         |      |
| 16-44                                   | 336 (7.86)                            | 203 (8.09)                                    | 133 (7.52)                              | 7.3                                                     | .11     | 181 (7.49)                              | 2.7                                                     | .43  |
| 45-64                                   | 1143 (26.72)                          | 636 (25.36)                                   | 507 (28.66)                             |                                                         |         | 658 (27.22)                             |                                                         |      |
| 65-84                                   | 2610 (61.02)                          | 1558 (62.12)                                  | 1052 (59.47)                            |                                                         |         | 1467 (60.70)                            |                                                         |      |
| 85-94                                   | 187 (4.37)                            | 111 (4.43)                                    | 76 (4.3)                                |                                                         |         | 111 (4.59)                              |                                                         |      |
| ≥95                                     | 1 (0.02)                              | 0 (0.00)                                      | 1 (0.06)                                |                                                         |         | 0 (0)                                   |                                                         |      |
| Place of birth                          |                                       |                                               |                                         |                                                         |         |                                         |                                                         |      |
| Spain                                   | 2815 (65.82)                          | 1663 (66.31)                                  | 1152 (65.12)                            | 4.7                                                     | .03     | 1527 (63.18)                            | 5.3                                                     | .02  |
| Outside Spain                           | 1462 (34.18)                          | 845 (33.69)                                   | 617 (34.88)                             |                                                         |         | 890 (36.82)                             |                                                         |      |
| Hospital                                |                                       |                                               |                                         |                                                         |         |                                         |                                                         |      |
| University Hospital of Vinalopó         | 2168 (50.69)                          | 1335 (53.23)                                  | 936 (52.91)                             | <0.1                                                    | .84     | 1271 (52.59)                            | 0.2                                                     | .65  |
| University Hospital of Torrevieja       | 2109 (49.31)                          | 1173 (46.77)                                  | 833 (47.09)                             |                                                         |         | 1146 (47.41)                            |                                                         |      |
| Admission diagnosis                     |                                       |                                               |                                         |                                                         |         |                                         |                                                         |      |
| Circulatory system diseases             | 2420 (56.58)                          | 1406 (56.06)                                  | 1014 (57.32)                            | 4.1                                                     | .66     | 1392 (57.59)                            | 8.6                                                     | .20  |
| Symptoms, signs, and ill-defined states | 416 (9.73)                            | 242 (9.65)                                    | 174 (9.84)                              |                                                         |         | 217 (8.98)                              |                                                         |      |
| Injuries and poisoning                  | 348 (8.14)                            | 208 (8.29)                                    | 140 (7.91)                              |                                                         |         | 200 (8.27)                              |                                                         |      |
| Neoplasms                               | 298 (6.97)                            | 173 (6.90)                                    | 125 (7.07)                              |                                                         |         | 153 (6.33)                              |                                                         |      |
| Diseases of the digestive system        | 252 (5.89)                            | 162 (6.46)                                    | 90 (5.09)                               |                                                         |         | 121 (5.01)                              |                                                         |      |
| Diseases of the respiratory system      | 145 (3.39)                            | 87 (3.47)                                     | 58 (3.28)                               |                                                         |         | 80 (3.31)                               |                                                         |      |
| Other <sup>e</sup>                      | 398 (9.31)                            | 230 (9.17)                                    | 168 (9.5)                               |                                                         |         | 254 (10.51)                             |                                                         |      |
| APACHE II score (range 0-66), mean (SD) | 15.7 (8.93)                           | 15.51 (8.85)                                  | 15.98 (9.04)                            | -1.70                                                   | .09     | 15.40 (9.19)                            | 0.42                                                    | .67  |
| Hemoglobin level                        |                                       |                                               |                                         |                                                         |         |                                         |                                                         |      |
| Low                                     | 1957 (45.76)                          | 1169 (46.61)                                  | 788 (44.54)                             | 5.9                                                     | .05     | 1118 (46.26)                            | 9.2                                                     | .001 |
| Normal                                  | 2251 (52.63)                          | 1291 (51.48)                                  | 960 (54.27)                             |                                                         |         | 1277 (52.83)                            |                                                         |      |
| High                                    | 69 (1.61)                             | 48 (1.91)                                     | 21 (1.19)                               |                                                         |         | 22 (0.91)                               |                                                         |      |
| Pressure injury present on admission    |                                       |                                               |                                         |                                                         |         |                                         |                                                         |      |
| Yes                                     | 136 (3.18)                            | 86 (3.43)                                     | 50 (2.83)                               | 2.4                                                     | .12     | 78 (3.23)                               | 0.2                                                     | .69  |
| No                                      | 4141 (96.82)                          | 2422 (96.57)                                  | 1719 (97.17)                            |                                                         |         | 2339 (96.77)                            |                                                         |      |

Abbreviations: APACHE, Acute Physiology and Chronic Health Evaluation.

<sup>a</sup> Values in this column are number (percentage) of sample, except for APACHE scores, which are mean (SD).

<sup>b</sup> The  $\chi^2$ , t, and P values represent the comparison between the testing sample and the training sample from phase 1.

<sup>c</sup> Values less than .05 were considered significant.

<sup>d</sup> The  $\chi^2$ , t, and P values represent the comparison between the testing sample from phase 2 and the training sample from phase 1.

<sup>e</sup> Endocrine, nutritional, metabolic, and immune disorders; diseases of the nervous system and the sense organs; diseases of the genitourinary system; diseases of the osteomyoarticular system and paired tissue; mental, behavioral, and neurodevelopmental disorders; diseases of the blood and the hematopoietic organs; infectious and parasitic diseases; congenital anomalies; additional classification of external causes of injuries and intoxications; morphology of neoplasms; diseases of the skin and subcutaneous tissue.

to this article) to train and test the model and we determined criteria for extracting the variables from the EMRs.

The data were processed to generate an initial database that we used to select the algorithm. The variables were categorized according to the nature of the data and previously defined ranges and were grouped into the following domains (some previously used by Coleman et al<sup>13</sup>): activity/mobility, age, care process, gender, general health status, hematological measures, medication, mental status, nutrition, moisture, place of birth, scales of risk, skin status, and

surgical intervention. The diseases described in the abbreviated Charlson comorbidity index<sup>31</sup> were included in the study in the domain of general health status. The diagnoses were codified per the *International Classification of Diseases, Ninth Revision (ICD-9)* for 2016 and the *Tenth Revision (ICD-10)* for 2017. The Supplement to this article shows the timing of data collection from the EMR for each variable. Missing values were processed and the sample was normalized. Different techniques for handling missing values were applied depending on the characteristics of the variable, mainly averaging

**Table 2**  
Performance of the different predictive classification models of risk for pressure injuries

| Model                               | Sensitivity | 95% CI    | Specificity | 95% CI    | Accuracy | 95% CI    | Area under curve | 95% CI    |
|-------------------------------------|-------------|-----------|-------------|-----------|----------|-----------|------------------|-----------|
| Averaged perception                 | 0.87        | 0.79-0.95 | 0.22        | 0.20-0.24 | 0.25     | 0.23-0.27 | 0.64             | 0.57-0.71 |
| Bayes point machine                 | 0.04        | 0.00-0.09 | 0.93        | 0.93-0.95 | 0.90     | 0.89-0.92 | 0.51             | 0.44-0.58 |
| Boosted decision tree               | 0.65        | 0.54-0.76 | 0.58        | 0.56-0.61 | 0.59     | 0.56-0.61 | 0.68             | 0.61-0.75 |
| Boosted decision forest             | 0.30        | 0.19-0.41 | 0.86        | 0.84-0.87 | 0.84     | 0.82-0.85 | 0.70             | 0.63-0.77 |
| Decision jungle                     | 0.35        | 0.24-0.46 | 0.86        | 0.85-0.88 | 0.84     | 0.83-0.85 | 0.68             | 0.61-0.75 |
| Locally deep support vector machine | 0.70        | 0.59-0.80 | 0.76        | 0.74-0.78 | 0.75     | 0.73-0.77 | 0.69             | 0.62-0.76 |
| Logistic regression                 | 0.91        | 0.85-0.98 | 0.12        | 0.11-0.14 | 0.15     | 0.13-0.17 | 0.71             | 0.64-0.78 |
| Neural network                      | 0.83        | 0.74-0.92 | 0.17        | 0.15-0.19 | 0.19     | 0.18-0.21 | 0.57             | 0.50-0.64 |
| Support vector machine              | 0.96        | 0.91-1.00 | 0.12        | 0.11-0.14 | 0.16     | 0.14-0.18 | 0.68             | 0.61-0.75 |

techniques to substitute means for missing values of continuous variables and to substitute modes for missing values of categorical variables. Although this decreases the variance in the data set, it was the most feasible approach to handle the missing data because it provided the best accuracy for the effort required.

To select a machine learning algorithm, we compared the performance of 9 classification algorithms available in Microsoft Azure Machine Learning (Table 2) with the testing subsample of phase 1 and the 67 variables. We calculated the sensitivity (effectiveness of the algorithm on a positive class);

specificity (effectiveness of the algorithm on a negative class); accuracy (overall effectiveness of the algorithm); and area under the receiver operating characteristic curve, which shows the relationship between the sensitivity and the specificity of the algorithm. After we selected the algorithm with the best measures, we identified the most significant vari-

ables and performed data cleansing. We used the synthetic minority oversampling technique to balance the classification of patient groups with and without PIs. In the second phase, during which the model was put into production and tested in a real environment, the data preparation process was carried out independently by the model itself.

#### Data Analysis and Machine Learning

In the first phase, after the algorithm was selected, we used permutation functions to calculate the individual contribution of each of the 67 variables to the discriminative capacity of the model (see the Supplement to this article). We performed these calculations

to elucidate the relationship between the independent variables and the dependent one within the model.<sup>32</sup> We then used these values to eliminate variables with low or no results and repeated the process (calculate-eliminate) iteratively to improve the metrics and achieve greater result accuracy and content validity.

To determine whether the model represented an improvement over standard practice in the field, we compared the results obtained by the selected algorithm (a risk exists from 0.50 or higher) and those obtained by the Norton scale (a risk exists at 15 points or less) on the testing sample from the first phase for sensitivity, specificity, area under the curve (AUC), positive predictive value, negative predictive value, and accuracy and their 95% confidence intervals. We calculated the  $\chi^2$  and Student *t* test values for each variable in the test sample in phase 1 to explore whether the variables that were used by the model in the group of patients in whom PIs developed differed from the variables used in the group that did not. In phase 2, the same measures (sensitivity, specificity, etc) were calculated as the model was used on patient data obtained in the real environment after the model was put into production.

The cloud platform of Microsoft Azure and R software (v. 3.4.2) were used for statistical analysis during the development of the project.

#### Ethical Considerations

This study was approved by the Research Committee (University Hospital of Torrevieja and University Hospital of Vinalopó). Patients' data were anonymized.

#### Results

##### Description of the Sample

The total sample consisted of 6694 patients, and the accumulated incidence rate of patients with PIs was 4.12% or an incidence of 4.25 patients with

The model integrated into the electronic medical record allows nurses to identify risk of pressure injuries occurring objectively and accurately.



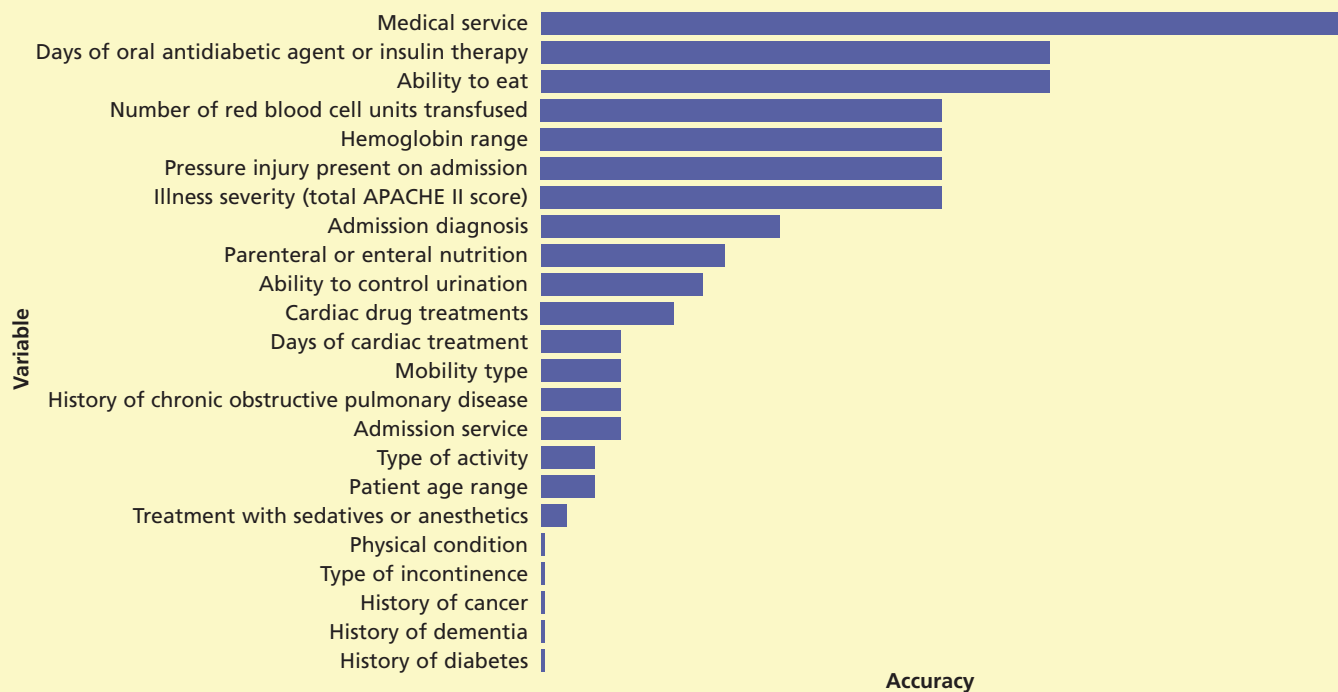

**Figure 2** Importance of the variables in the logistic regression model.

Abbreviation: APACHE, Acute Physiology and Chronic Health Evaluation.

PIs per 1000 days of stay in the hospital. The accumulated incidence rate of PIs that developed in the ICU was 2.83% or 3.10 per 1000 days of stay. The sample had more men (66%) than women, and the age range with the highest percentage of patients was 65 to 84 years.

We compared the sample used for testing versus the training sample. The subsamples used for initial testing (phase 1;  $n = 1769$ ) and testing in a real environment (phase 2;  $n = 2417$ ) were similar to the training sample (phase 1;  $n = 2508$ ) in all characteristics except for the place of birth (phase 1,  $P = .03$ ; phase 2,  $P = .02$ ) and hemoglobin level (phase 2,  $P = .001$ ). These differences were statistically significant but they are not clinically significant (Table 1).

### Phase 1 Data Mining and Machine Learning

To select a machine learning algorithm, we compared performance metrics of 9 machine learning algorithms in predicting PI incidence in the testing data set (Table 2). Out of these 9 algorithms, we selected logistic regression because it had the highest AUC (0.71) and the second-highest sensitivity (0.91).

Twenty-three variables were definitively part of the model. The importance of each variable is shown by the size of the horizontal bars in Figure 2. The variables that contributed most to the discriminative capacity of the model were medical service, days of oral antidiabetic agent or insulin therapy, ability to eat (Barthel scale), number of red blood cell

units transfused, hemoglobin range, PI present on admission, and illness severity (APACHE [Acute Physiology and Chronic Health Evaluation] II score). In general, patients who had a PI develop were more likely to be in the ICU ( $P = .03$ ) and had been treated for more days with an oral antidiabetic agent or insulin ( $P < .001$ ), were less able to eat independently ( $P < .001$ ), had undergone transfusion of more red blood cell units ( $P < .001$ ), were more likely to have a low hemoglobin level ( $P < .001$ ), were less likely to have had a PI at admission ( $P = .09$ ), and had higher APACHE II scores ( $P < .001$ ) than did patients who did not have PIs develop.

The receiver operating characteristic curve produced by the logistic regression model in phase 1 is shown in Figure 3A. Data from phase 1 show that the logistic regression model performed better than the Norton scale in sensitivity (0.90 vs 0.85), specificity (0.74 vs 0.64), AUC (0.89 vs 0.75), positive predictive value (11.98% vs 8.76%), negative predictive value (99.44% vs 99.09%) and accuracy (0.74 vs 0.65). The CIs for specificity, AUC, and accuracy from phase 1 do not overlap (Table 3).

### Phase 2 Data Mining and Machine Learning

The receiver operating characteristic curve produced by the logistic regression model in phase 2 is shown in Figure 3B. The results obtained by applying the Norton scale and the logistic regression model to the test sample in phase 2 confirm that the model

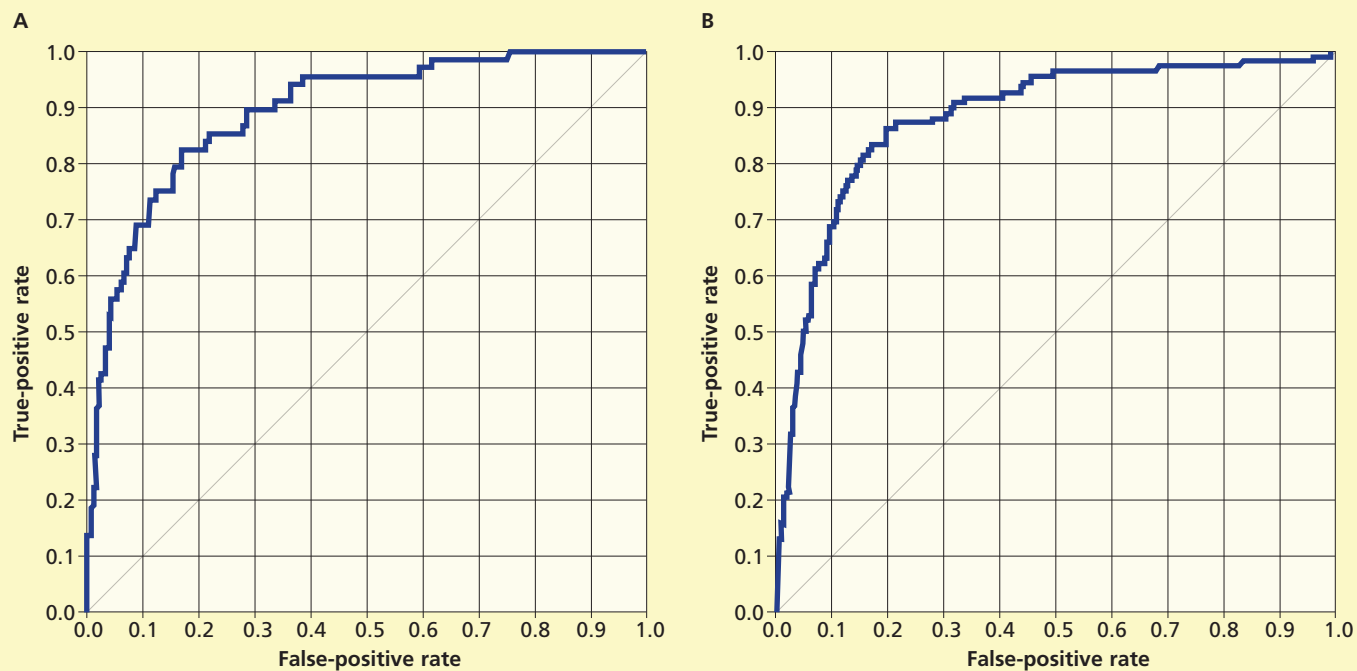

**Figure 3** Receiver operator characteristic curves for the logistic regression model. A, Phase 1 (area under the curve [AUC], 0.89; 95% CI, 0.85-0.94). B, Phase 2 (AUC, 0.88; 95% CI, 0.85-0.92).

**Table 3**  
Results of the Norton scale and the logistic regression model in phases 1 and 2

| Statistic                    | Phase 1 |             |                           |             |                         | Phase 2 |             |                           |             |                         |
|------------------------------|---------|-------------|---------------------------|-------------|-------------------------|---------|-------------|---------------------------|-------------|-------------------------|
|                              | Norton  | 95% CI      | Logistic regression model | 95% CI      | Difference <sup>a</sup> | Norton  | 95% CI      | Logistic regression model | 95% CI      | Difference <sup>a</sup> |
| Sensitivity                  | 0.85    | 0.77-0.94   | 0.90                      | 0.82-0.97   | 0.05                    | 0.87    | 0.81-0.93   | 0.75                      | 0.67-0.83   | -0.12                   |
| Specificity                  | 0.64    | 0.62-0.67   | 0.74                      | 0.72-0.76   | 0.10                    | 0.67    | 0.65-0.69   | 0.88                      | 0.86-0.89   | 0.21                    |
| Area under curve             | 0.75    | 0.69-0.80   | 0.89                      | 0.85-0.94   | 0.14                    | 0.77    | 0.73-0.80   | 0.88                      | 0.85-0.92   | 0.11                    |
| False positives              | 604     |             | 448                       |             |                         | 771     |             | 288                       |             |                         |
| False negatives              | 10      |             | 7                         |             |                         | 14      |             | 27                        |             |                         |
| True positives               | 58      |             | 61                        |             |                         | 94      |             | 81                        |             |                         |
| True negatives               | 1092    |             | 1253                      |             |                         | 1538    |             | 2021                      |             |                         |
| Positive predictive value, % | 8.76    | 6.61-10.92  | 11.98                     | 9.16-14.81  | 3.22                    | 10.87   | 8.79-12.94  | 21.95                     | 17.73-26.17 | 11.08                   |
| Negative predictive value, % | 99.09   | 98.53-99.65 | 99.44                     | 99.03-99.85 | 0.35                    | 99.10   | 98.64-99.57 | 98.68                     | 98.19-99.18 | -0.42                   |
| Accuracy                     | 0.65    | 0.63-0.68   | 0.74                      | 0.72-0.77   | 0.09                    | 0.68    | 0.66-0.69   | 0.87                      | 0.86-0.88   | 0.19                    |

<sup>a</sup> Difference is the logistic regression model value minus the Norton value.

outperformed the Norton scale in specificity (0.88 vs 0.67), AUC (0.88 vs 0.77), positive predictive value (21.95% vs 10.87%), and accuracy (0.87 vs 0.68) but had lower values for sensitivity (0.75 vs 0.87) and negative predictive value (98.68% vs 99.10%). The CIs for specificity, AUC, positive predictive value, and accuracy from phase 2 do not overlap (Table 3). Overall, these data demonstrate that the logistic regression model has high discriminative capacity.

## Discussion

We used data mining and machine learning techniques to construct a model to detect PI risk in patients admitted to an ICU and put the model into production in a real environment. Our sample of 6694 patients had an accumulated incidence rate of PI of 4.12% and a rate of 2.83% for PIs that developed while the patients were in the ICU. This incidence rate is slightly lower than incidence rates reported

in previous studies,<sup>6,7</sup> which range from 3.3% to 53.4%. The main reasons for these differences could be the type of ICU (medical-surgical), the median stay (7 days), and possibly methodological differences across studies.

The model, a logistic regression algorithm, consisted of 23 variables. The 7 variables that most contributed to the model were as follows:

- Medical service (care process domain)
- Days of oral antidiabetic agent or insulin treatment (medication domain)
- Ability to eat, Barthel scale (activity/mobility domain)
- Number of red blood cell units transfused (hematological measures domain)
- Hemoglobin range (hematological measures domain)
- PI present on admission (skin status domain)
- Illness severity, APACHE II (general health status domain)

All domains included in the model (under the same name or similar) had been identified as significant in previous studies.<sup>13,33</sup>

Regarding the characteristics of patients who had a PI develop, every variable denotes their vulnerability, with the exception of the variable "PI present on admission," which was not statistically significant. This could mean that patients who have a PI on admission could be receiving specific nurse interventions (regardless of the risk score), which could mask the relationship being studied.

In both phase 1 and phase 2, performance metrics showed that the logistic regression model was better at detecting risk of PI than the Norton scale was for every statistic except for sensitivity in phase 2. These data suggest that the discriminative capacity of the logistic regression model is better than that of the Norton scale alone. The results of our model compare favorably with results from scale evaluation studies<sup>10,34</sup> and predictive models.<sup>18,19,23,24</sup> We found an example of an AUC similar to that of our model (0.90 vs 0.89) in a Braden scale meta-analysis,<sup>8</sup> but we did not find better results for other measures (sensitivity, specificity, and accuracy) in any study. Thus it appears that the logistic regression model produces a better overall result than other methods. Furthermore, these positive outcomes continued after the model was put into production and tested with a sample in a real environment in phase 2.

This study has some limitations. First, some reported risk factors, such as body temperature,<sup>35,36</sup> could not be included in the model because of excessive missing values or inability to extract the data from

the EMR. Second, although we did recover a significant number of PIs from the EMRs with an algorithm that searched free text records, we cannot ensure that all PIs that developed during the period of the study were accounted for (ie, the number of PI cases may have been underreported). Third, the built model is a "black box"<sup>32</sup>; we cannot clearly see how each variable affects the risk of PI development. Fourth, PI prevention interventions provided by nurses were not considered in this study because this variable is not accurately documented in the EMR. And fifth, although the sample size was significant, the usefulness of the predictive model to other hospital centers is unknown because the model is dependent on the data that feed it (although we expect that the variables included in the model could be extracted from EMRs in other settings).

The model has been put into production in a real environment and integrated into the EMR, and it allows nurses to identify risk of PI incidence objectively and accurately from admission to discharge, because it provides an automatic and continuous prediction based on real-time clinical data. Unlike other risk scales, the model recognizes changes in the patient's condition over time. This helps caregivers focus on preventative care for the patients who need it most, without burdening nurses with the need to gather new information.

## Conclusion

The model, developed using data mining and machine learning techniques, offers very good results and provides greater predictive power than the Norton scale alone, or other models, in our context. Integrating these models into their usual practice will make it easier for hospitals to direct preventive care toward patients who need it most without unnecessarily increasing the workload of care providers. Important challenges that remain to be addressed include evaluating the model's results just for the period that patients stay in the ICU, and validating the model in other hospital settings.

## FINANCIAL DISCLOSURES

None reported.

## SEE ALSO

For more about pressure injuries, visit the *Critical Care Nurse* website, [www.ccnonline.org](http://www.ccnonline.org), and read the article by McGee et al, "Pressure Injuries at Intensive Care Unit Admission as a Prognostic Indicator of Patient Outcomes" (June 2019).

## REFERENCES

1. National Pressure Ulcer Advisory Panel, European Pressure Ulcer Advisory Panel, Pan Pacific Pressure Injury Alliance; Haesler E, ed. *Prevention and Treatment of Pressure Ulcers*:



- Quick Reference Guide*. Cambridge Media: Osborne Park, Australia; 2014.
- Edsberg LE, Langemo D, Baharestani MM, Posthauer ME, Goldberg M. Unavoidable pressure injury: state of the science and consensus outcomes. *J Wound Ostomy Continence Nurs*. 2014;41(4):313-334.
  - Black JM, Edsberg LE, Baharestani MM, et al. Pressure ulcers: avoidable or unavoidable? Results of the National Pressure Ulcer Advisory Panel Consensus Conference. *Ostomy Wound Manage*. 2011;57(2):24-37.
  - Goldberg, M. General acute care. In: Pieper B, National Pressure Ulcer Advisory Panel, eds. *Pressure Ulcers: Prevalence, Incidence, and Implications for the Future*. Washington, DC: National Pressure Ulcer Advisory Panel; 2012.
  - Moore Z, Johanssen E, van Etten M. A review of PU prevalence and incidence across Scandinavia, Iceland and Ireland (Part I). *J Wound Care*. 2013;22(7):361-368.
  - Torra i Bou JE. *Incidencia de Úlceras por Presión en Unidades de Cuidados Intensivos: Revisión Sistemática con Meta-análisis [Incidence of Pressure Ulcers in Intensive Care Units: Systematic Review with Meta-analysis]*. Master's thesis. Universidad de Alicante; 2016.
  - Cuddigan J. Critical care. In: Pieper B, National Pressure Ulcer Advisory Panel, eds. *Pressure Ulcers: Prevalence, Incidence, and Implications for the Future*. Washington, DC: National Pressure Ulcer Advisory Panel; 2012.
  - Padula WV, Delarmente BA. The national cost of hospital acquired pressure injuries in the United States. *Int Wound J*. 2019 Jun;16(3):634-640.
  - Pancorbo-Hidalgo PL, García-Fernández FP, Lopez-Medina IM, Alvarez-Nieto C. Risk assessment scales for pressure ulcer prevention: a systematic review. *J Adv Nurs*. 2006; 54(1):94-110.
  - García-Fernández FP, Pancorbo-Hidalgo PL, Soldevilla Agreda JJ, RodríguezTorres MDC. Assessment of the risk of developing pressure ulcers in critical care units: systematic review with meta-analysis [in Spanish]. *Gerokomos*. 2013; 24(2):82-89.
  - Norton D, McLaren R, Exton-Smith A. *An Investigation of Geriatric Nursing Problems in Hospital*. London: Churchill Livingstone; 1962.
  - Nixon J, Cranny G, Iglesias C, et al. Randomised, controlled trial of alternating pressure mattresses compared with alternating pressure overlays for the prevention of pressure ulcers: PRESSURE (pressure relieving support surfaces) trial. *BMJ*. 2006;332(7555):1413.
  - Coleman S, Gorecki C, Nelson EA, et al. Patient risk factors for pressure ulcer development: systematic review. *Int J Nurs Stud*. 2013;50(13):974-1003.
  - Baumgarten M, Rich S, Shardell M, et al. Care-related risk factors for hospital-acquired pressure ulcers in elderly adults with hip fracture. *J Am Geriatr Soc*. 2012;60(2):277-283
  - Bly D, Schallom M, Sona C, Klinkenberg D. A model of pressure, oxygenation, and perfusion risk factors for pressure ulcers in the intensive care unit. *Am J Crit Care*. 2016; 25(2):156-164.
  - Nijs N, Toppets A, Defloor T, Bernaerts K, Milisen K., Van Den Berghe G. Incidence and risk factors for pressure ulcers in the intensive care unit. *J Clin Nurs*. 2009;18(9):1258-1266.
  - Raju D, Su X, Patrician PA, Loan LA, McCarthy MS. Exploring factors associated with pressure ulcers: a data mining approach. *Int J Nurs Stud*. 2015;52(1):102-111.
  - Cho IS, Chung E. Predictive Bayesian network model using electronic patient records for prevention of hospital-acquired pressure ulcers. *J Korean Acad Nurs*. 2011;41(3):423-431.
  - Kaewprag P, Newton C, Vermillion B, Hyun S, Huang K, Machiraju R. Predictive models for pressure ulcers from intensive care unit electronic health records using Bayesian networks. *BMC Med Inform Decis Mak*. 2017;5(17):65.
  - Moyse T, Bates J, Karafa M, Whitman A, Albert NM. Validation of a model for predicting pressure injury risk in patients with vascular diseases. *J Wound Ostomy Continence Nurs*. 2017;44(2):118-122.
  - Nakamura Y, Ghaibeh AA, Setoguchi Y, et al. On-admission pressure ulcer prediction using the nursing needs score. *JMIR Med Inform*. 2015;3(1):e8.
  - Lahmann NA, Tannen A, Dassen T, Kottner J. Friction and shear highly associated with pressure ulcers of residents in long-term care: Classification Tree Analysis (CHAID) of Braden items. *J Eval Clin Pract*. 2011;17(1):168-173.
  - Alderden J, Pepper GA, Wilson A, et al. Predicting pressure injury in critical care patients: a machine-learning model. *Am J Crit Care*. 2018;27(6):461-468.
  - Kaewprag P, Newton C, Vermillion B, Hyun S, Huang K, Machiraju R. Predictive modelling for pressure ulcers from intensive care unit electronic health records. *AMIA Jt Summits Transl Sci Proc*. 2015;2015:82-86.
  - Cho I, Park I, Kim E, Lee E, Bates DW. Using EMR data to predict hospital-acquired pressure ulcers: a prospective study of a Bayesian Network model. *Int J Med Inform*. 2013;82(11):1059-1067.
  - Jin Y, Jin T, Lee SM. Automated pressure injury risk assessment system incorporated into an electronic health record system. *Nurs Res*. 2017;66(6):462-472.
  - Dans E. Stop experimenting with machine learning and start actually using it. Forbes website. <https://www.forbes.com/sites/enriqueandans/2019/07/21/stop-experimenting-with-machine-learning-and-start-actually-using-it/#57f4adbc3365>. Accessed August 1, 2019.
  - Ade RR, Deshmukh PR. Methods for incremental learning: a survey. *Int J Data Min Knowl Manag Process*. 2013;3(4):119-125.
  - Shearer C, Watson HJ, Grecich DG, et al. The CRISP-DM model: the new blueprint for data mining. *J Data Warehousing*. 2000;5(4):13-22.
  - García-Fernández FP, Soldevilla-Ágreda JJ, Pancorbo-Hidalgo PL, et al. *Categorization Classification of Injuries Related to Dependence* [in Spanish]. Logroño, Spain: Grupo Nacional de Estudio y Asesoramiento en Úlceras Por Presión; 2014.
  - Berkman LF, Leo-Summers L, Horwitz RI. Emotional support and survival after myocardial infarction: a prospective, population-based study of the elderly. *Ann Intern Med*. 1992;117(12):1003-1009.
  - Castelvecchi D. Can we open the black box of AI? *Nature*. 2016;538(7623):20-23.
  - Alderden J, Rondinelli J, Pepper G, Cummins M, Whitney JA. Risk factors for pressure injuries among critical care patients: a systematic review. *Int J Nurs Stud*. 2017;71:97-114.
  - González-Ruiz JM, Sebastián-Viana T, Losa-Iglesias ME, et al. Braden Scale and Norton Scale modified by INSALUD in an acute care hospital: validity and cutoff point. *Adv Skin Wound Care*. 2014;27(11): 506-511.
  - Nijs N, Toppets A, DeFloor T, Bernaerts K, Milisen K, Van Den Berghe G. Incidence and risk factors for pressure ulcers in the intensive care unit. *J Clin Nurs*. 2009;18(9):1258-1266.
  - Sanada H, Sugama J, Thigpen B, Subuh M. Development of a new risk assessment scale for predicting pressure ulcers in an intensive care unit. *Nurs Crit Care*. 2008;13(1):34-43.

To purchase electronic or print reprints, contact American Association of Critical-Care Nurses, 27071 Aliso Creek Road, Aliso Viejo, CA 92656. Phone, (800) 899-1712 or (949) 362-2050 (ext 532); fax, (949) 362-2049; email, reprints@aacn.org.

**Supplement**  
**Variables initially included in the logistic regression classification model**

| Variable                                                      | Domain                | No. of values | Score <sup>a</sup> | Timing of data collection                                                           |
|---------------------------------------------------------------|-----------------------|---------------|--------------------|-------------------------------------------------------------------------------------|
| Number of red blood cell units transfused <sup>b</sup>        | Hematologic measures  | All           | 0.012500           | Right before a PI in the group with PI and before discharge in the group without PI |
| Medical service <sup>b</sup>                                  | Care process          | 31            | 0.009034           | Right before a PI in the group with PI and before discharge in the group without PI |
| Days of antifungal, antiviral, or anti-biotic treatment       | Medication            | All           | 0.007644           | During the whole stay                                                               |
| Days of stay in ICU                                           | Care process          | All           | 0.006254           | During the whole stay in ICU                                                        |
| Enteral or parenteral nutrition days                          | Nutrition             | All           | 0.006254           | During the whole stay                                                               |
| PI present on admission <sup>b</sup>                          | Skin status           | 2             | 0.004864           | On admission                                                                        |
| Number of platelet units transfused                           | Hematologic measures  | All           | 0.003475           | During the whole stay                                                               |
| Hemoglobin range <sup>b</sup>                                 | Hematologic measures  | 3             | 0.002780           | Right before a PI in the group with PI and before discharge in the group without PI |
| History of chronic kidney disease                             | General health status | 2             | 0.002085           | Medical record before admission                                                     |
| Ability to control urination (Barthel scale) <sup>b</sup>     | Moisture              | 3             | 0.002085           | Right before a PI in the group with PI and before discharge in the group without PI |
| Physical condition (Norton scale) <sup>b</sup>                | General health status | 4             | 0.001390           | Right before a PI in the group with PI and before discharge in the group without PI |
| Barthel value (total result, Barthel scale)                   | Activity/mobility     | 21            | 0.001390           | Right before a PI in the group with PI and before discharge in the group without PI |
| Platelet transfusion                                          | Hematologic measures  | 2             | 0.001390           | During the whole stay                                                               |
| Days of OAD or insulin therapy <sup>b</sup>                   | Medication            | All           | 0.001390           | During the whole stay                                                               |
| Norton value (total result, Norton scale)                     | Scales of risk        | 15            | 0.000695           | Right before a PI in the group with PI and before discharge in the group without PI |
| Barthel (result by rank, Barthel scale)                       | Activity/mobility     | 5             | 0.000695           | Right before a PI in the group with PI and before discharge in the group without PI |
| Ability to walk (Barthel scale)                               | Activity/mobility     | 4             | 0.000695           | Right before a PI in the group with PI and before discharge in the group without PI |
| Albumin value                                                 | Hematologic measures  | Decimal       | 0.000695           | Right before a PI in the group with PI and before discharge in the group without PI |
| Cardiac drug treatments <sup>b</sup>                          | Medication            | 2             | 0.000695           | During the whole stay                                                               |
| Number of plasma units transfused                             | Hematologic measures  | All           | 0.000695           | During the whole stay                                                               |
| Patient's age range <sup>b</sup>                              | Age                   | 5             | 0.000000           | On admission                                                                        |
| Sex                                                           | Sex                   | 2             | 0.000000           | On admission                                                                        |
| Place of birth                                                | Place of birth        | 2             | 0.000000           | On admission                                                                        |
| Admission type                                                | Care process          | 2             | 0.000000           | On admission                                                                        |
| Admission diagnosis <sup>b</sup>                              | General health status | 38            | 0.000000           | On admission                                                                        |
| History of strokes                                            | General health status | 2             | 0.000000           | Medical record before admission                                                     |
| History of diabetes <sup>b</sup>                              | General health status | 2             | 0.000000           | Medical record before admission                                                     |
| History of chronic obstructive pulmonary disease <sup>b</sup> | General health status | 2             | 0.000000           | Medical record before admission                                                     |
| History of chronic cardiac failure                            | General health status | 2             | 0.000000           | Medical record before admission                                                     |
| History of dementia <sup>b</sup>                              | General health status | 2             | 0.000000           | Medical record before admission                                                     |
| History of peripheral arterial disease                        | General health status | 2             | 0.000000           | Medical record before admission                                                     |
| History of cancer <sup>b</sup>                                | General health status | 2             | 0.000000           | Medical record before admission                                                     |
| Norton 16 (result by rank, Norton scale)                      | Scales of risk        | 2             | 0.000000           | Right before a PI in the group with PI and before discharge in the group without PI |
| Type of activity (Norton scale) <sup>b</sup>                  | Activity/mobility     | 4             | 0.000000           | Right before a PI in the group with PI and before discharge in the group without PI |
| Mental condition (Norton scale)                               | Mental status         | 4             | 0.000000           | Right before a PI in the group with PI and before discharge in the group without PI |
| Type of incontinence (Norton scale) <sup>b</sup>              | Moisture              | 4             | 0.000000           | Right before a PI in the group with PI and before discharge in the group without PI |
| Ability to wash (Barthel scale)                               | Activity/mobility     | 2             | 0.000000           | Right before a PI in the group with PI and before discharge in the group without PI |
| Ability to dress (Barthel scale)                              | Activity/mobility     | 2             | 0.000000           | Right before a PI in the group with PI and before discharge in the group without PI |

*Continued*

**Supplement  
Continued**

| Variable                                                     | Domain                | No. of values | Score <sup>a</sup> | Timing of data collection                                                                                     |
|--------------------------------------------------------------|-----------------------|---------------|--------------------|---------------------------------------------------------------------------------------------------------------|
| Ability to move (Barthel scale)                              | Activity/mobility     | 4             | 0.000000           | Right before a PI in the group with PI and before discharge in the group without PI                           |
| Total days of stay                                           | Care process          | All           | 0.000000           | During the whole stay                                                                                         |
| OAD or insulin therapy                                       | Medication            | 2             | 0.000000           | During the whole stay                                                                                         |
| Treatment with antifungal agents                             | Medication            | 2             | 0.000000           | During the whole stay                                                                                         |
| Days of treatment with sedatives or anesthetics <sup>b</sup> | Medication            | All           | 0.000000           | During the whole stay                                                                                         |
| Treatment with vasopressors                                  | Medication            | 2             | 0.000000           | During the whole stay                                                                                         |
| Days of vasopressor treatment                                | Medication            | All           | 0.000000           | During the whole stay                                                                                         |
| Days of cardiac treatment <sup>b</sup>                       | Medication            | All           | 0.000000           | During the whole stay                                                                                         |
| Plasma transfusion                                           | Hematologic measures  | 2             | 0.000000           | During the whole stay                                                                                         |
| Red blood cell transfusion                                   | Hematologic measures  | 2             | 0.000000           | During the whole stay                                                                                         |
| Parenteral or enteral nutrition <sup>b</sup>                 | Nutrition             | 2             | 0.000000           | During the whole stay                                                                                         |
| No. of major surgeries                                       | Surgical intervention | All           | 0.000000           | Right before a PI in the group with PI and before discharge in the group without PI                           |
| PO <sub>2</sub> range                                        | Hematologic measures  | 3             | 0.000000           | Right before a PI in the group with PI and before discharge in the group without PI                           |
| Nitrogen range                                               | Hematologic measures  | 2             | 0.000000           | Right before a PI in the group with PI and before discharge in the group without PI                           |
| Transferrin range                                            | Hematologic measures  | 3             | 0.000000           | Right before a PI in the group with PI and before discharge in the group without PI                           |
| Prealbumin range                                             | Hematologic measures  | 3             | 0.000000           | Right before a PI in the group with PI and before discharge in the group without PI                           |
| Days without PI                                              | Care process          | All           | 0.000000           | Days between admission and PI development in the group with PI and total days of stay in the group without PI |
| Norton 14 (result by rank, Norton scale)                     | Scales of risk        | 2             | 0.000000           | Right before a PI in the group with PI and before discharge in the group without PI                           |
| Capacity to go up and down stairs (Barthel scale)            | Activity/mobility     | 3             | -0.000695          | Right before a PI in the group with PI and before discharge in the group without PI                           |
| Charlson Comorbidity Index (classified by rank)              | General health status | 3             | -0.000695          | Medical record before admission                                                                               |
| Ability for bowel movements (Barthel scale)                  | Moisture              | 3             | -0.000695          | Right before a PI in the group with PI and before discharge in the group without PI                           |
| Ability to go to the toilet (Barthel scale)                  | Activity/mobility     | 3             | -0.000695          | Right before a PI in the group with PI and before discharge in the group without PI                           |
| Treatment with sedatives or anesthetics                      | Medication            | 2             | -0.000695          | During the whole stay                                                                                         |
| Mobility type (Norton scale) <sup>b</sup>                    | Activity/mobility     | 4             | -0.001390          | Right before a PI in the group with PI and before discharge in the group without PI                           |
| Ability to dress (Barthel scale)                             | Activity/mobility     | 3             | -0.001390          | Right before a PI in the group with PI and before discharge in the group without PI                           |
| Illness severity (total APACHE II score) <sup>b</sup>        | General health status | 67            | -0.001390          | Right before a PI in the group with PI and before discharge in the group without PI                           |
| No. of categories of the Charlson comorbidity index          | General health status | 9             | -0.001390          | Right before a PI in the group with PI and before discharge in the group without PI                           |
| Ability to eat (Barthel scale) <sup>b</sup>                  | Activity/mobility     | 3             | -0.003475          | Right before a PI in the group with PI and before discharge in the group without PI                           |
| Admission service <sup>b</sup>                               | Care process          | 31            | -0.041700          | On admission                                                                                                  |

Abbreviations: APACHE, Acute Physiology and Chronic Health Evaluation; ICU, intensive care unit; OAD, oral antidiabetic agent; PI, pressure injury.

<sup>a</sup> This score represents the contribution of the variable to the discriminative capacity of the initial model.

<sup>b</sup> Variable definitively part of the final model.
